# Supplementary material for: Prevalence of Anxiety and Depression and Related Risk Factors Among Patients with Noncommunicable Diseases in Northwest Syria Cross- Sectional Study
Source: Research Square preprint supplement (doi:10.21203/rs.3.rs-8402335/v1), 2026-01-21
Supplement: Supplementary file 1 [file 3d2140d63ebc0ebf87dbe0e3.pdf]

## Annex 1: Questionnaire for the prevalence of Anxiety and Depression among people with non-communicable diseases

(The doctor/pharmacist in the health facility will explain how to fill out the questionnaire, and if the participants want to ask questions about the research and/or want additional information they can contact the researcher via his contacts mentioned below).

Do you agree to participate in the research: a) Yes b) No

Which district:

- Afrin
- Jinderes
- Dana
- Maaret Tamrin

### **Part 1: Demographical information:**

- Age:
- Sex:
- Place of residence: a) camp b) outside the camp
- Marital status: a) Married b) single c) widowed d) divorced
- Employment status: a) Employed b) Unemployed
- If employed, what is it?
- Economic status: a) Income is higher than spending b) Income is lower than spending c) Income equals spending.
- Educational attainments: a) Uneducated b) Primary c) Middle school d) Secondary e) University (institute or university)
- Type of chronic disease: a) cardiovascular b) cancer c) chronic respiratory diseases e) diabetes. And when has it been diagnosed.
- Personal and family history of mental illnesses: a) Yes b) No
- If yes, what is it?

## Part 2: Hospital Anxiety and Depression Scale (HADS)

### Hospital Anxiety and Depression Scale (HADS)

Tick the box beside the reply that is closest to how you have been feeling in the past week.  
Don't take too long over you replies: your immediate is best.

| D | A |                                                                                     | D | A |                                                                              |
|---|---|-------------------------------------------------------------------------------------|---|---|------------------------------------------------------------------------------|
|   |   | <b>I feel tense or 'wound up':</b>                                                  |   |   | <b>I feel as if I am slowed down:</b>                                        |
| 3 |   | Most of the time                                                                    | 3 |   | Nearly all the time                                                          |
| 2 |   | A lot of the time                                                                   | 2 |   | Very often                                                                   |
| 1 |   | From time to time, occasionally                                                     | 1 |   | Sometimes                                                                    |
| 0 |   | Not at all                                                                          | 0 |   | Not at all                                                                   |
|   |   | <b>I still enjoy the things I used to enjoy:</b>                                    |   |   | <b>I get a sort of frightened feeling like 'butterflies' in the stomach:</b> |
| 0 |   | Definitely as much                                                                  | 0 |   | Not at all                                                                   |
| 1 |   | Not quite so much                                                                   | 1 |   | Occasionally                                                                 |
| 2 |   | Only a little                                                                       | 2 |   | Quite Often                                                                  |
| 3 |   | Hardly at all                                                                       | 3 |   | Very Often                                                                   |
|   |   | <b>I get a sort of frightened feeling as if something awful is about to happen:</b> |   |   | <b>I have lost interest in my appearance:</b>                                |
| 3 |   | Very definitely and quite badly                                                     | 3 |   | Definitely                                                                   |
| 2 |   | Yes, but not too badly                                                              | 2 |   | I don't take as much care as I should                                        |
| 1 |   | A little, but it doesn't worry me                                                   | 1 |   | I may not take quite as much care                                            |
| 0 |   | Not at all                                                                          | 0 |   | I take just as much care as ever                                             |
|   |   | <b>I can laugh and see the funny side of things:</b>                                |   |   | <b>I feel restless as I have to be on the move:</b>                          |
| 0 |   | As much as I always could                                                           | 3 |   | Very much indeed                                                             |
| 1 |   | Not quite so much now                                                               | 2 |   | Quite a lot                                                                  |
| 2 |   | Definitely not so much now                                                          | 1 |   | Not very much                                                                |
| 3 |   | Not at all                                                                          | 0 |   | Not at all                                                                   |
|   |   | <b>Worrying thoughts go through my mind:</b>                                        |   |   | <b>I look forward with enjoyment to things:</b>                              |
| 3 |   | A great deal of the time                                                            | 0 |   | As much as I ever did                                                        |
| 2 |   | A lot of the time                                                                   | 1 |   | Rather less than I used to                                                   |
| 1 |   | From time to time, but not too often                                                | 2 |   | Definitely less than I used to                                               |
| 0 |   | Only occasionally                                                                   | 3 |   | Hardly at all                                                                |
|   |   | <b>I feel cheerful:</b>                                                             |   |   | <b>I get sudden feelings of panic:</b>                                       |
| 3 |   | Not at all                                                                          | 3 |   | Very often indeed                                                            |
| 2 |   | Not often                                                                           | 2 |   | Quite often                                                                  |
| 1 |   | Sometimes                                                                           | 1 |   | Not very often                                                               |
| 0 |   | Most of the time                                                                    | 0 |   | Not at all                                                                   |
|   |   | <b>I can sit at ease and feel relaxed:</b>                                          |   |   | <b>I can enjoy a good book or radio or TV program:</b>                       |
| 0 |   | Definitely                                                                          | 0 |   | Often                                                                        |
| 1 |   | Usually                                                                             | 1 |   | Sometimes                                                                    |
| 2 |   | Not Often                                                                           | 2 |   | Not often                                                                    |
| 3 |   | Not at all                                                                          | 3 |   | Very seldom                                                                  |

Please check you have answered all the questions

The researcher's contact information:

Phone and WhatsApp: +90 535 829 01 20

Email: kassemballout1984@gmail.com
